# Pharmacological Targeting of Native CatSper Channels Reveals a Required Role in Maintenance of Sperm Hyperactivation

Anne E. Carlson<sup>1</sup>, Lindsey A. Burnett<sup>1</sup>, Donato del Camino<sup>2</sup>, Timothy A. Quill<sup>3</sup>, Bertil Hille<sup>1</sup>, Jayhong A. Chong<sup>2</sup>, Magdalene M. Moran<sup>2</sup>, Donner F. Babcock<sup>1\*</sup>

**1** Department of Physiology and Biophysics, University of Washington, Seattle, Washington, United States of America, **2** Hydra Biosciences Inc., Cambridge, Massachusetts, United States of America, **3** Cecil H. and Ida Green Center for Reproductive Biology Sciences, Department of Pharmacology, University of Texas Southwestern Medical Center, Dallas, Texas, United States of America

## Abstract

The four sperm-specific CatSper ion channel proteins are required for hyperactivated motility and male fertility, and for Ca<sup>2+</sup> entry evoked by alkaline depolarization. In the absence of external Ca<sup>2+</sup>, Na<sup>+</sup> carries current through CatSper channels in voltage-clamped sperm. Here we show that CatSper channel activity can be monitored optically with the [Na<sup>+</sup>]<sub>i</sub>-reporting probe SBFI in populations of intact sperm. Removal of external Ca<sup>2+</sup> increases SBFI signals in wild-type but not CatSper2-null sperm. The rate of the indicated rise of [Na<sup>+</sup>]<sub>i</sub> is greater for sperm alkalinized with NH<sub>4</sub>Cl than for sperm acidified with propionic acid, reflecting the alkaline-promoted signature property of CatSper currents. In contrast, the [Na<sup>+</sup>]<sub>i</sub> rise is slowed by candidate CatSper blocker HC-056456 (IC<sub>50</sub> ~3 μM). HC-056456 similarly slows the rise of [Ca<sup>2+</sup>]<sub>i</sub> that is evoked by alkaline depolarization and reported by fura-2. HC-056456 also selectively and reversibly decreased CatSper currents recorded from patch-clamped sperm. HC-056456 does not prevent activation of motility by HCO<sub>3</sub><sup>-</sup> but does prevent the development of hyperactivated motility by capacitating incubations, thus producing a phenocopy of the CatSper-null sperm. When applied to hyperactivated sperm, HC-056456 causes a rapid, reversible loss of flagellar waveform asymmetry, similar to the loss that occurs when Ca<sup>2+</sup> entry through the CatSper channel is terminated by removal of external Ca<sup>2+</sup>. Thus, open CatSper channels and entry of external Ca<sup>2+</sup> through them sustains hyperactivated motility. These results indicate that pharmacological targeting of the CatSper channel may impose a selective late-stage block to fertility, and that high-throughput screening with an optical reporter of CatSper channel activity may identify additional selective blockers with potential for male-directed contraception.

**Citation:** Carlson AE, Burnett LA, del Camino D, Quill TA, Hille B, et al. (2009) Pharmacological Targeting of Native CatSper Channels Reveals a Required Role in Maintenance of Sperm Hyperactivation. PLoS ONE 4(8): e6844. doi:10.1371/journal.pone.0006844

**Editor:** Harald H. H. W. Schmidt, Monash University, Australia

**Received:** April 23, 2008; **Accepted:** August 7, 2009; **Published:** August 31, 2009

**Copyright:** © 2009 Carlson et al. This is an open-access article distributed under the terms of the Creative Commons Attribution License, which permits unrestricted use, distribution, and reproduction in any medium, provided the original author and source are credited.

**Funding:** Supported by grant HD12629-27 from the Eunice Kennedy Shriver National Institute of Child Health and Development of the National Institutes of Health through cooperative agreement U54 as part of the Specialized Cooperative Centers Program in Reproduction and Infertility Research (AEC, BH, and DFB), by grant R43 HD045028-01 (JAC and MMM), and by grant HD-36022 (TAQ). TAQ also supported in part by the Cecil H. and Ida Green Center for Reproductive Biology Sciences. The funders had no role in study design, data collection, analysis and interpretation, decision to publish, or preparation of the manuscript.

**Competing Interests:** AEC, LAB, TAQ, BH and DFB declare that no competing interests exist. JAC, DDC and MMM are employees and shareholders of Hydra Biosciences.

\* E-mail: donner@u.washington.edu

## Introduction

We have known for many years that Ca<sup>2+</sup> and cAMP messengers play central roles in the preparation of sperm for fertilization in the physiologic sequence that is collectively called ‘capacitation’ [1]. However, the last 5 years have brought a great increase in our knowledge of the details of Ca<sup>2+</sup> and cAMP signaling in sperm. The advances resulted largely from discovery that signaling in sperm uses several unique proteins that are produced primarily or exclusively in meiotic and post-meiotic spermatogenic cells, opening the door for genetic approaches to study sperm signaling pathways and their roles. Thus, targeted disruption of the genes for the sperm-specific Cα2 catalytic subunit of PKA [2] or for SACY, the atypical adenylyl cyclase of sperm [3–5], produced male infertility. The specific phenotypic defects that were found in the null-mutant sperm revealed a dichotomy: acceleration of the flagellar beat and facilitation of evoked Ca<sup>2+</sup>

channel activity required SACY [5,6] and PKA-Cα2 [2], whereas a basal flagellar beat and a basal rate of evoked Ca<sup>2+</sup> channel activity did not.

Similar advances in our understanding of Ca<sup>2+</sup> signaling in sperm followed discovery that spermatogenic cells express a novel putative Ca<sup>2+</sup> channel formed by the four members of the unique family of CatSper ion channel proteins. CatSper family proteins are expressed exclusively in spermatogenic cells and specifically traffic to membranes of the developing sperm flagellum. Targeted disruption of CatSper1 [7], CatSper2 [8], or of CatSper3 or CatSper4 [9,10] each produced male infertility. The seemingly identical phenotypes of the CatSper family null-mutant sperm result from the co-dependent expression of the CatSper-1 and -2 [10,11] and of the CatSper-3 and -4 [10] proteins. A physical association of these proteins with each other and with other interacting partners [12] presumably allows them to form functional channels and may stabilize them from degradation.

Like the SACY-null sperm, CatSper-null sperm initiate and sustain a basal flagellar beat [11,13]. However, unlike SACY-null sperm, the  $\text{HCO}_3^-$  anion still accelerates the flagellar beat of CatSper1- and -2 null sperm indicating that downstream cAMP-mediated responses are unperturbed by the absence of CatSper proteins. Conversely, the CatSper-null sperm lack depolarization-evoked  $\text{Ca}^{2+}$  entry [11,14] and the inward  $\text{Ca}^{2+}$  current that is observed in wild-type sperm [7,9,15]. They also fail to develop hyperactivated motility [8–11,14]. These results indicated that CatSper channels are required as the route for the  $\text{Ca}^{2+}$  entry needed to produce the asymmetric flagellar waveform that underlies hyperactivation.

Although the loss-of-function phenotype provides definitive evidence of a required role for CatSper channels in hyperactivation, it has remained unclear whether the requirement is for the onset of hyperactivation, for its maintenance, or for both. We have now identified HC-056456 as a blocker of CatSper channel activity and find no hyperactivation for sperm that receive capacitating incubations in its presence. In this and other respects, HC-056456 produces a pharmacological phenocopy of the CatSper-null sperm. We also find that acute application of HC-056456 causes rapid loss of flagellar waveform asymmetry from hyperactivated sperm, indicating that continued entry of  $\text{Ca}^{2+}$  through CatSper channels is required to maintain hyperactivation.

Although monitoring of CatSper currents in patch-clamped sperm is the definitive method to establish channel-blocking activity, an inability to express CatSper channels in cultured cells has prevented large-scale screening of chemical libraries for CatSper channel blockers. We have now validated an optical method that reports activity of native CatSper channels in populations of intact sperm. The method should be readily adaptable to high-throughput screening protocols.

## Materials and Methods

### Chemicals

Fura-2 acetoxymethyl (AM) ester, SBFI-AM, and Pluronic F127 were from Molecular Probes (Eugene, OR). HC-056456 (3,4-bis(2-thienylcarbonyl)-1,2,5-oxadiazole-2-ium-2-olate; for structure, see Supplemental Fig. S1) was from Maybridge Chemical Co. Ltd. (Tintagel, Cornwall, UK). All other chemicals were from Sigma (St. Louis, MO).

### Animals and Cell Preparation

All animal procedures followed accepted standards of humane animal care, approved by the Animal Care and Use Committee at the University of Washington. As in prior work [16,17], sperm were collected from excised caudae epididymides and vasa deferentia of euthanized male mice. Sperm were washed twice then dispersed and stored at  $1-2 \times 10^7$  cells  $\text{ml}^{-1}$  at room temperature (22–25°C) in medium HS [11,17]. Some experiments used modified HS medium with no added  $\text{CaCl}_2$  (0 mM  $\text{Ca}^{2+}$  treatments). Other experiments used a sodium-free medium that contained (in mM): 135 N-methyl-D-glucamine (NMDG), 5 KCl, 2  $\text{CaCl}_2$ , 1  $\text{MgSO}_4$ , 10 glucose, 20 HEPES, adjusted pH to 7.4 with KOH. As in past work [14,18], depolarization-evoked responses were produced with alkaline medium K8.6 and hyperactivation was produced by 90 min of incubation under capacitating conditions. Capacitated sperm were then transferred back into medium HS and sampled for waveform analysis within 30–45 min.

All waveform analyses and photometric experiments were conducted in glass-bottomed 35 mm culture dishes. For local perfusion experiments, test solutions were applied by a solenoid-

controlled, gravity-fed, multi-barreled local perfusion device with an estimated exchange time of  $<0.5$  s.

### Waveform Analysis

The flagellar waveform was analyzed as described [17]. Briefly, stop-motion images were captured with stroboscopic (1 ms) illumination. A semi-automated analysis program written in Igor Pro (Wavemetrics, Lake Oswego, OR) allowed tracing of the flagellum and determination of various waveform parameters including flagellar beat frequency and asymmetry. Here we introduce the asymmetry integral (derived by integration of the time-averaged tangent angle over the proximal half of the flagellum), as a more-inclusive measure of the bias of flagellar bending. All results are presented as mean  $\pm$  SEM, except where noted.

### Dye Loading and Calcium and Sodium Photometry

Fura-2-AM and SBFI-AM were dispensed from 2 mM stocks in DMSO, dispersed in 10–15% Pluronic F127, and diluted to 20  $\mu\text{M}$  in 0.5 ml of sperm suspension. After 30–40 min, cells were sedimented, then resuspended and incubated in fresh HS for an additional 45 min before use. A TILL (Gräfelfing, Germany) monochromator provided excitation light of 340 and 380 nm, and a photodiode detector with an adjustable viewfinder collected  $>450$  nm emission from a rectangular region containing a small cluster (3–5 cells) of loosely-tethered sperm. The raw  $F_{340}$  and  $F_{380}$  photometric signals were corrected for the cell-free background, collected prior to each series of measurements.

The ratio of the corrected fura-2 signals,  $R_{\text{fura-2}}$ , was calibrated as described previously using the constants:  $B = 1228$  nM,  $R_{\text{min}} = 0.3795$ , and  $R_{\text{max}} = 1.792$  [11,14]. The calibrated  $R_{\text{fura-2}}$  signal reports spatially-averaged internal  $[\text{Ca}^{2+}]$  from the head and proximal flagellum of several sperm. The background-corrected but uncalibrated  $R_{\text{SBFI}}$  ( $F_{340}/F_{380}$ ) signals report relative internal  $[\text{Na}^+]$ . Statistical analyses were performed in Excel (Microsoft, Redmond, WA).

### Electrophysiological recording of CatSper and K<sub>Sper</sub> currents

Mouse sperm were isolated from freshly dissected mouse epididymides and incubated in buffer HS. Macroscopic currents were recorded in the whole sperm configuration of the patch-clamp technique using an EPC-9 amplifier and Patchmaster software (HEKA). Patch pipettes had a resistance of 7–14 M $\Omega$ .

For CatSper currents recording conditions were essentially as described in Kirichok, et al. [15]. The pipette solution contained (in mM): 140 Cs-MES, 5 NaCl, 10 EGTA, 10 HEPES pH 7.2 with NaOH. The bath contained (in mM) 150 Na-Gluconate, 2 EGTA, 2 H-EDTA, 20 HEPES, pH 7.4 with NaOH. K<sub>Sper</sub> currents were recorded using methods similar to those described in Navarro et al. [19]. Pipettes were filled with an internal solution (in mM): 5 EGTA, 10 HEPES, 10 MES, 140 K-MeSO<sub>3</sub>, 10 MES, pH 8 with KOH. The bath solution contained (in mM): 150 K-MeSO<sub>3</sub>, 10 MES, 10 HEPES, pH 7.2 with KOH. The holding potential was 0 mV, and 400-ms ramps from  $-100$  mV to 100 mV were applied every 5 s. The data were collected at 10 kHz and filtered at 2.9 kHz. Liquid junction potential correction was not used. Experiments were performed at room temperature. HC-056456 was prepared fresh as a 10–50 mM stock solutions in DMSO and diluted into the external buffer immediately before application to the sperm.

## Results

### Removal of external $\text{Ca}^{2+}$ allows intracellular $\text{Na}^+$ to rise

In past work, we found that the CatSper channel of sperm is the predominant route for the entry of  $\text{Ca}^{2+}$  into sperm that is evoked

by alkaline depolarizing medium K8.6 [11,14]. We wanted to develop a simple optical assay for CatSper activity.  $\text{Ca}^{2+}$  channels, including CatSper [9,15], readily pass  $\text{Na}^+$  in the absence of their preferred  $\text{Ca}^{2+}$  ion. We therefore reasoned that we could optically monitor  $\text{Na}^+$ -entry via the CatSper channel into intact sperm examined in  $\text{Ca}^{2+}$ -free solutions. For sperm loaded with the  $[\text{Na}^+]_i$  probe SBFI (Fig. 1A), the ratiometric SBFI signal ( $R_{\text{SBFI}}$ ) remained constant while cells were bathed with medium HS, whereas the  $R_{\text{SBFI}}$  signal increased at a rate of  $\sim 0.02 \Delta R_{\text{SBFI}} \text{ min}^{-1}$  upon acute exposure to a  $\text{Ca}^{2+}$ -deficient HS. The  $\text{Na}^+$  entry indicated by the rising  $R_{\text{SBFI}}$  stopped abruptly when  $\text{Ca}^{2+}$  was returned and  $[\text{Na}^+]_i$  began to return to the resting  $[\text{Na}^+]_i$ .

The  $[\text{Na}^+]_i$  sensitivity of the  $R_{\text{SBFI}}$  signal was validated by use of the  $\text{Na}^+$ -selective ionophore monensin. The  $R_{\text{SBFI}}$  increased in response to the  $\text{Na}^+$  entry that occurred upon addition of monensin to cells in medium HS (Fig. 1B) and decreased when monensin promoted  $\text{Na}^+$  release into a  $\text{Na}^+$ -deficient (NMDG-substituted) medium (Fig. 1C). When monensin and NMDG<sup>+</sup> were removed from the perfusing medium,  $[\text{Na}^+]_i$  rose rapidly, driven by the restored inward-directed  $[\text{Na}^+]_i$  gradient and mediated by monensin retained in sperm membranes. Removal of monensin from the HS medium used in Fig. 1B initiated a much slower recovery towards the initial  $[\text{Na}^+]_i$ . Presumably, continued entry of  $\text{Na}^+$  mediated by residual membrane-associated monensin continued to oppose cellular mechanisms for extrusion of  $\text{Na}^+$  and restoration of resting  $[\text{Na}^+]_i$ . Visual observation indicated that the sperm flagellar beat was slowed but still present after monensin treatment, thus membrane integrity and cellular SBFI content had not been compromised.

Although SBFI is widely used to monitor  $[\text{Na}^+]_i$ , the dye is notoriously difficult to calibrate (see Meier et al., 2006 [20]). In Fig. 1B the  $R_{\text{SBFI}}$  increased by  $\sim 0.06$  when monensin discharged transmembrane gradients of  $[\text{Na}^+]_i$  and internal  $[\text{Na}^+]_i$  rose to the  $>100 \text{ mM}$  contained in the HS medium. In Fig. 1C the  $R_{\text{SBFI}}$  decreased by  $\sim 0.08$  when monensin lowered internal  $[\text{Na}^+]_i$  towards the  $<1 \text{ mM}$   $\text{Na}^+$  present in the NMDG medium. These results are consistent with an initial resting internal  $[\text{Na}^+]_i$  slightly above the  $K_d$  of  $\sim 10 \text{ mM}$   $\text{Na}^+$  for SBFI in vitro (and close to the  $14 \text{ mM}$   $[\text{Na}^+]_i$  reported for sperm using an alternative optical method [21]). Based on these approximations, we estimate that

internal  $[\text{Na}^+]_i$  rose to  $40\text{--}50 \text{ mM}$  during the 60 s zero-calcium stimulus applied in Fig. 1A.

### $\text{Na}^+$ entry requires CatSper

To more directly test the hypothesis that the rise in  $[\text{Na}^+]_i$  results from entry of  $\text{Na}^+$  via the CatSper channel, we compared the SBFI responses in sperm from CatSper2<sup>-/-</sup> males with those from their CatSper2<sup>+/-</sup> littermates. Upon removal of external  $\text{Ca}^{2+}$ , the  $R_{\text{SBFI}}$  in CatSper2<sup>-/-</sup> sperm remained constant, but it increased at  $0.03 \Delta R_{\text{SBFI}} \text{ min}^{-1}$  in CatSper2<sup>+/-</sup> sperm (Fig. 2A,B). CatSper2<sup>-/-</sup> sperm lack both CatSper1 and CatSper2 proteins, yet they retain normal immunolocalization of  $\text{Ca}_v$  channels [11]. Therefore, the loss of entry of  $\text{Na}^+$  evoked by removal of external  $\text{Ca}^{2+}$  results specifically from the absence of CatSper channel proteins.

### Raising internal pH promotes $\text{Na}^+$ entry

We sought additional evidence that the increase in  $[\text{Na}^+]_i$  evoked by  $\text{Ca}^{2+}$ -free solution (Figs. 2A,B) shares characteristics with CatSper currents. CatSper current is responsive to changes in intracellular pH; intracellular acidification reduced, and alkalinization increased, the CatSper-dependent  $\text{Na}^+$  currents recorded from voltage-clamped sperm [15]. Figs. 2C,D show that for intact sperm monitored with SBFI and challenged with  $\text{Ca}^{2+}$ -deficient medium, the rate of rise ( $\Delta R_{\text{SBFI}}$ ) was  $0.045 \pm 0.005 \text{ min}^{-1}$  in ammonium-supplemented medium and  $0.030 \pm 0.002 \text{ min}^{-1}$  in propionate-supplemented medium. Such brief treatments with  $15 \text{ mM}$   $\text{NH}_4\text{Cl}$  increased spatially-averaged sperm  $\text{pH}_i$  from  $\sim 6.8$  to  $\sim 7.2$ , whereas treatments with propionate decreased  $\text{pH}_i$  to  $\sim 6.4$  [16]. Thus the rise in  $[\text{Na}^+]_i$  evoked in intact sperm shows the property of promotion by alkalinization that is a signature of CatSper currents in patch-clamped sperm [15].

### HC-056456 blocks evoked $\text{Ca}^{2+}$ and $\text{Na}^+$ entry

The CatSper channel is the predominant route for evoked  $\text{Ca}^{2+}$  entry into intact mouse sperm [11,14]. Compound HC-056456 was identified as a potential inhibitor of CatSper in a chemical-library screen (see United States Patent applications 20070004785 and 20080311578). We therefore examined the efficacy of HC-056456 to inhibit evoked  $\text{Ca}^{2+}$  entry. In Figs. 3A–C, fura-2 reported the spatially-averaged  $[\text{Ca}^{2+}]_i$  of sperm during challenge

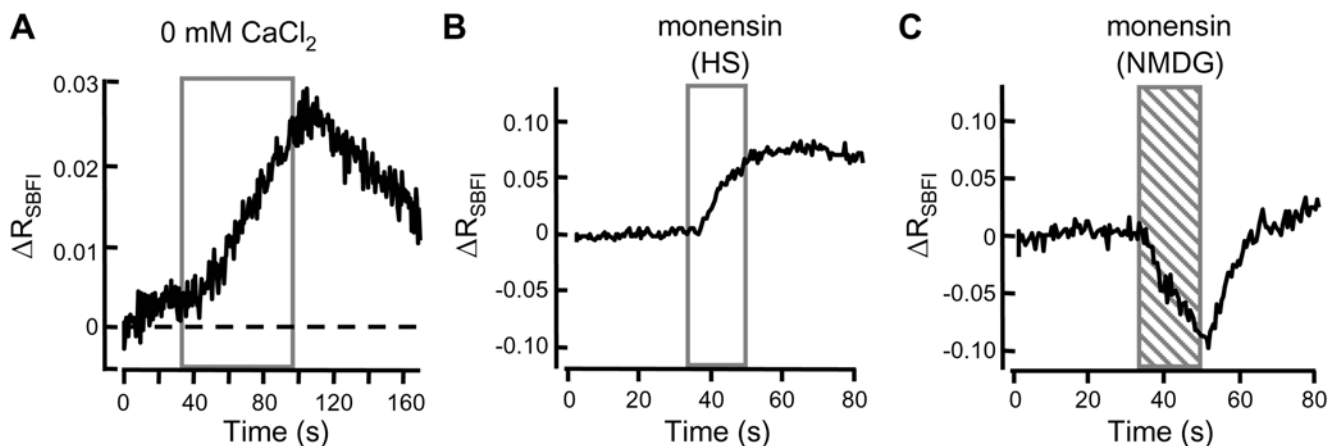

**Figure 1. Intracellular  $\text{Na}^+$  increases evoked by removal of external  $\text{Ca}^{2+}$ .** Averaged 340/380 fluorescence ratio signals from the  $[\text{Na}^+]_i$  probe SBFI. The initial ratio ( $R_0 = 0.59\text{--}0.66$ ; observed in the first 10 s of each recording) was subtracted from all  $R_{\text{SBFI}}$  values. The normalized  $\Delta R_{\text{SBFI}}$  data were then averaged. (A) Sperm were perfused with medium HS, then for 60 s (boxed) with  $\text{Ca}^{2+}$ -deficient HS (79 clusters of cells in 5 independent experiments). (B,C) Sperm were perfused with medium HS, then for 30 s (boxed) with medium HS or with NMDG-substituted ( $\text{Na}^+$ -deficient) HS medium each fortified with  $10 \mu\text{M}$  monensin (8–25 clusters of cells in 2 independent experiments). doi:10.1371/journal.pone.0006844.g001

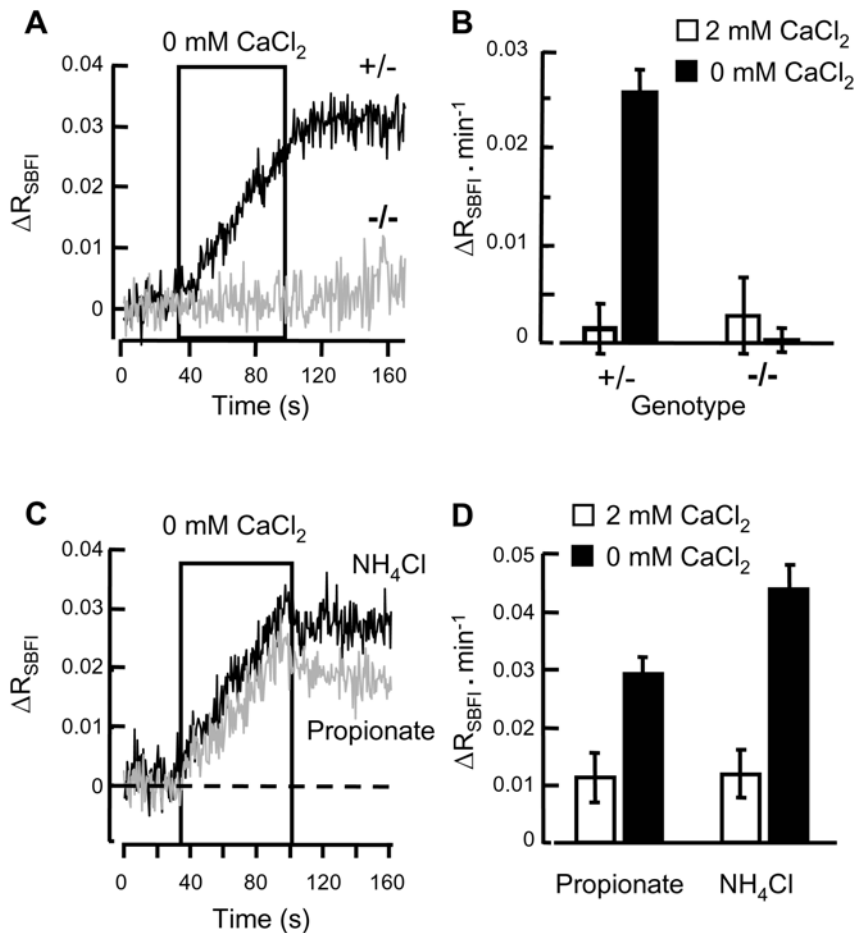

**Figure 2. Evoked  $[\text{Na}^+]_i$  rise requires CatSper2.** Responses of the SBF1 probe monitored from small clusters of CatSper2-null sperm (gray trace,  $-/-$ ) and of sperm from their heterozygous littermates (black trace,  $+/-$ ). (A) Cells were perfused first with medium HS, then for 60 s (boxed) with  $\text{Ca}^{2+}$ -deficient HS. Lines are averages of normalized  $\Delta R_{\text{SBFI}}$  data. (B) Averaged rate of change in  $\Delta R_{\text{SBFI}}$  before and during perfusion with  $\text{Ca}^{2+}$ -deficient HS medium (49–50 cell clusters in 3 independent experiments). (C) Wild-type sperm were perfused with medium HS then for 60 s (boxed) with  $\text{Ca}^{2+}$ -deficient HS, both fortified with 15 mM  $\text{NH}_4\text{Cl}$  (black traces) or 15 mM Na propionate (gray traces). (D) Averaged normalized rates of rise of  $\Delta R_{\text{SBFI}}$  (9–14 groups of cells in 3 independent experiments).  
doi:10.1371/journal.pone.0006844.g002

with a paired-stimulus protocol. Medium K8.6 evoked averaged rates of rise of 8.7 and 6.6  $\text{nM } \Delta[\text{Ca}^{2+}]_i \text{ s}^{-1}$  during the first and second stimuli when no inhibitor was present. When 3  $\mu\text{M}$  HC-056456 was applied after the first stimulus, the averaged rate decreased from  $\sim 7.5$  to  $\sim 1.6$   $\text{nM } \Delta[\text{Ca}^{2+}]_i \text{ s}^{-1}$ . When 10  $\mu\text{M}$  HC-056456 was applied after the first stimulus, the averaged rate decreased more strongly, from  $\sim 7.0$  to  $\sim 0.7$   $\text{nM } \Delta[\text{Ca}^{2+}]_i \text{ s}^{-1}$ . Hence HC-056456 is an effective inhibitor of the CatSper  $\text{Ca}^{2+}$  channel activity that is evoked by alkaline depolarization. Fig. 3D shows that at 10  $\mu\text{M}$  the HC-056456 also strongly decreased the rise in  $[\text{Na}^+]_i$  that was evoked by removal of external  $\text{Ca}^{2+}$ . The rates of rise before and during exposure to HC-056456 were  $\sim 0.03$  and  $\sim 0.01$   $\Delta R_{\text{SBFI}} \text{ min}^{-1}$ .

#### HC-056456 selectively and reversibly blocks CatSper currents

We have used patch clamp recordings (see Supplemental Fig. S2) to examine the specificity and reversibility of the blockade of CatSper-dependent currents by HC-056456. Applied voltage ramps from  $-100$  mV to  $+100$  mV produced a large inward  $\text{Na}^+$  current that was almost completely blocked by the presence of 2 mM  $\text{Ca}^{2+}$  (Fig. S2A, inset). This apparent block by  $\text{Ca}^{2+}$  confounds efforts to

record from CatSper from sperm in a physiological medium. However, Fig. S2A shows that smaller CatSper currents could be recorded from cells bathed with solutions containing 700 nM  $\text{Ca}^{2+}$ . The observed current was blocked slightly more than 50% by 20  $\mu\text{M}$  HC-056456 (estimated  $\text{IC}_{50}$  near 15  $\mu\text{M}$ ). In concept, it remains possible that CatSper channel heterogeneity explains residual HC-056456-resistant current.

We also examined the action of HC-056456 on K<sub>Sper</sub> channels, the other major cation channel observed in patch-clamped sperm. The  $-100$  mV to  $+100$  mV voltage ramp produced an outwardly rectifying current that is a mixture of CatSper and K<sub>Sper</sub> in the inward direction, but is primarily K<sub>Sper</sub> in the outward direction (Fig. S2B). As previously observed [19], application of 500  $\mu\text{M}$  quinidine almost completely blocked this current. Subsequent application of 50  $\mu\text{M}$  HC-056456 resulted in partial blockade of this current. For HC-056456 action on K<sub>Sper</sub> we estimate an  $\text{IC}_{50}$  near 40  $\mu\text{M}$ . Thus HC-056456 is an effective but not perfectly-selective blocker of CatSper channels.

#### HC-056456 does not affect $\text{HCO}_3^-$ -evoked activation

To further assess the specificity of HC-056456 action, we monitored its effects on the  $\text{HCO}_3^-$ -evoked, cAMP-mediated

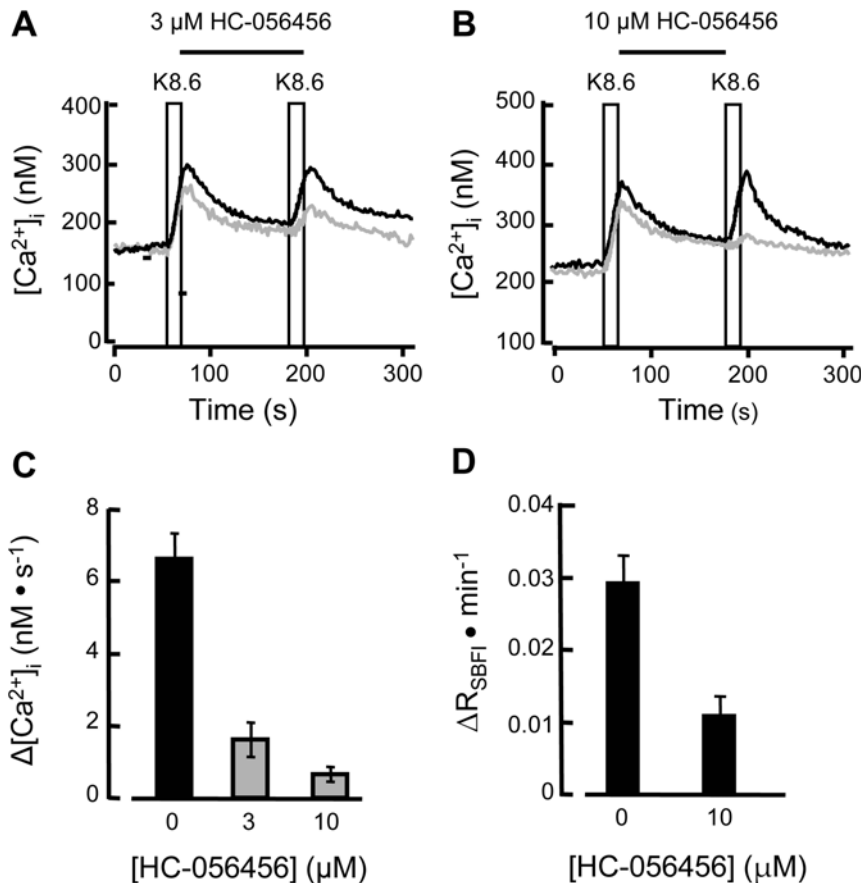

**Figure 3. HC-056456 blocks alkaline KCl-evoked increases in  $[Ca^{2+}]_i$  and  $[Na^+]_i$ .** (A,B) Intracellular  $[Ca^{2+}]_i$  for sperm perfused with HS alone (black traces) except during two 10 s stimuli with medium K8.6 (boxed). In a similar protocol using fresh sperm from the same animal, the inter-pulse medium HS also contained 3 or 10  $\mu M$  of HC-056456 (gray traces). In (A) the HC-056456 also was present in the K8.6 medium used for the second stimulus. (16–19 groups of cells in 3 independent experiments). (C) Averaged rates of rise for  $[Ca^{2+}]_i$  during the second stimulus. (D) Intracellular  $[Na^+]_i$  was monitored for cell clusters before and during a 60 s stimulus with  $Ca^{2+}$ -deficient HS medium as in Fig. 2. Parallel experiments were conducted with or without 10  $\mu M$  HC-056456 present in all perfusing media. Averaged rate of change  $\Delta R_{SBFI}$  was calculated as for Fig. 2 (13–14 groups of cells in 3 independent experiments).

doi:10.1371/journal.pone.0006844.g003

increase of flagellar beat frequency that is known as ‘activation’ [17]. Despite being dependent on external  $Ca^{2+}$  [16],  $HCO_3^-$ -evoked activation does not require the CatSper channel [11,14]. Fig. 4A shows that for sperm pre-incubated with 10  $\mu M$  HC-056456, 15 mM  $NaHCO_3$  still increased beat frequency >2-fold, indicating that HC-056456 has little effect on this major  $Ca^{2+}$ -dependent, but CatSper-independent, response.

### HC-056456 blocks onset of hyperactivation

The loss-of-function phenotype of CatSper-null sperm includes a lack of hyperactivation of motility [8–11,14], a late step of capacitation that is required for sperm to fertilize zona pellucida-intact oocytes. However, the delayed and asynchronous onset of hyperactivation has obscured whether CatSper channels are required for hyperactivation to initiate, for it to be sustained, or for both. The CatSper channel blocker HC-056456 now allows a pharmacological approach to these questions.

The flagellar waveform analysis developed in our past work measures the time-average of flagellar bending along the proximal flagellum. This asymmetry parameter (compared arbitrarily at 40  $\mu m$  along the flagellum) increases typically from <0.3 to >1 radian for sperm examined before and after capacitating incubations [11,14]. Fig. 4B compares asymmetry of wild-type

sperm following capacitating incubations in the presence or absence of 20  $\mu M$  HC-056456 and studied in fresh medium HS. The reduced asymmetry ( $0.4 \pm 0.1$  radians) of the sperm treated with HC-056456 indicates a strong blockade of the onset of hyperactivation that is maintained after removal of the drug. Thus prolonged incubation with HC-056456 produces a phenocopy of the lack-of-hyperactivation phenotype of the CatSper null sperm.

### Maintenance of hyperactivation requires open CatSper channels

Using acute application of HC-056456, we now can address the need for CatSper to sustain an established asymmetric beat. Specifically, previously hyperactivated sperm were perfused with medium HS alone, then HS supplemented with 20  $\mu M$  HC-056456. Fig. 5A shows the waveform asymmetry for a single, representative hyperactivated sperm before and during application of the inhibitor. For this cell, and for 5 other cells examined in trials with 3 other animals, the initially large negative asymmetry (assessed at 40  $\mu m$  along the flagellum) decreased from  $\sim 1.4$  radians before to  $\sim 0.2$  radians after 30 and 60 s of exposure to 20  $\mu M$  HC-056456. These results indicate that functional CatSper channels are required for the maintenance of hyperactivation and that CatSper channels remain open and are not inactivated in hyperactivated sperm.

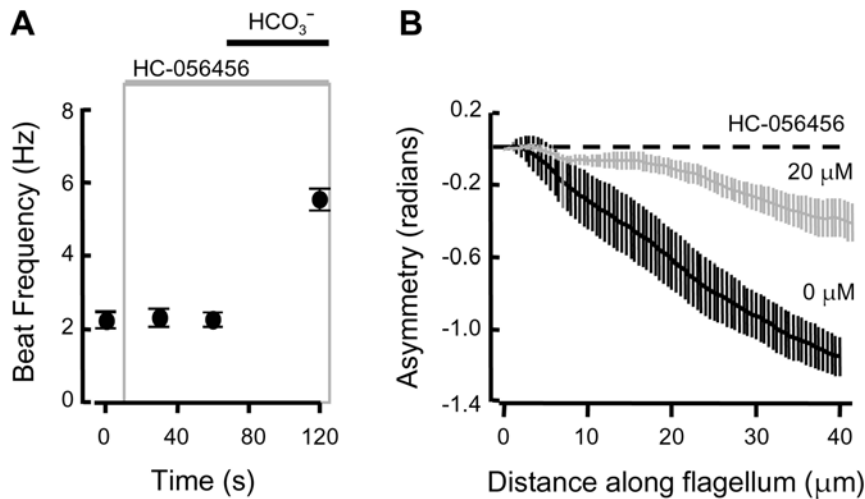

**Figure 4. Selective blockade of hyperactivation by HC-056456.** (A) Averaged beat frequencies for individual sperm perfused sequentially with medium HS, then HS fortified with 10  $\mu\text{M}$  HC-056456, then with HS containing both 10  $\mu\text{M}$  HC-056456 and 15 mM  $\text{NaHCO}_3$  ( $N=7$  cells, in 2 experiments). (B) Flagellar waveform asymmetry after pre-incubation under capacitating conditions in the presence (gray) or absence (black) of 20  $\mu\text{M}$  HC-056456. Sperm were transferred back into and perfused with medium HS prior to selection of representative cells for flagellar waveform analysis ( $N=13$  cells in 3 experiments). doi:10.1371/journal.pone.0006844.g004

Some early work found that both the initiation and the maintenance of hyperactivation require external  $\text{Ca}^{2+}$  [22], but other work reported that hyperactivation continued after removal of external  $\text{Ca}^{2+}$  [23]. We revisited this question. Waveform asymmetry of individual hyperactivated sperm was examined in HS medium, then in a  $\text{Ca}^{2+}$ -deficient medium HS. Fig. 5B shows that with 2 mM external  $\text{CaCl}_2$ , the mean asymmetry at 40  $\mu\text{m}$  along the flagellum was  $\sim 1.2$  radian. Within 30–60 s of perfusion with  $\text{Ca}^{2+}$ -deficient medium the asymmetry decreased to  $\sim 0.2$  radian, a value similar to that for sperm examined before the onset of hyperactivation [11,14]. Thus, to maintain hyperactivation, sperm require both open CatSper channels and available external  $\text{Ca}^{2+}$  to enter through them.

#### HC-056456 reversibly removes waveform asymmetry

In an extension of the experiments of Fig. 5A we asked whether removal of HC-056456 would allow previously-hyperactivated

sperm to recover waveform asymmetry. Fig. 6A shows that (as in Fig. 5A) 30 s of perfusion with HC-056456 decreased asymmetry for each cell examined. The averaged asymmetry integral for the proximal 50  $\mu\text{m}$  of flagellum decreased by  $>80\%$ . When treatment with the drug continued for another 30 s, several cells (not shown) became immotile and were excluded from analysis. Each surviving cell then recovered an asymmetrical waveform after 60 s perfusion with drug-free medium HS alone, and remained asymmetrical when the HS was fortified with 15 mM  $\text{NaHCO}_3$ . These results show that the action of the HC-056456 on waveform asymmetry is quite reversible, but suggests that HC-056456 may have additional actions on hyperactivated sperm. Indeed, Fig. 6B shows that beat frequency decreased during treatment with HC-056456 and remained depressed after 60 s recovery in medium HS. By contrast, Fig. 4A shows that beat frequency was unaltered during 60 s treatment of fresh sperm (examined prior to the onset

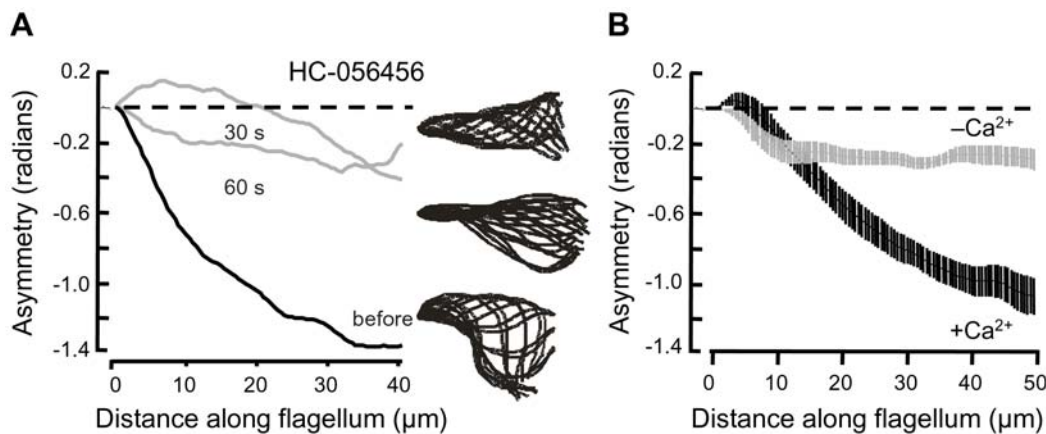

**Figure 5. Rapid loss of the flagellar waveform asymmetry of hyperactivation.** After incubation under capacitating conditions, sperm were transferred to fresh medium HS. (A) Waveform asymmetry of a representative sperm (analyzed during sequential perfusion with medium HS alone (before, black) and at 30 and 60 s after 20  $\mu\text{M}$  HC-056456 was added to the perfusing medium (gray). On the right, aligned flagellar waveform traces recorded over 2 beat cycles. (B) Averaged waveform asymmetry for sperm bathed in medium HS ( $+\text{Ca}^{2+}$ ) or in a  $\text{Ca}^{2+}$ -deficient medium HS ( $-\text{Ca}^{2+}$ ) as indicated (7–13 cells in 2 independent experiments). doi:10.1371/journal.pone.0006844.g005

of hyperactivation). Both fresh (Fig. 4A) and hyperactivated (Fig. 6B) sperm showed substantial acceleration of the flagellar beat when  $\text{HCO}_3^-$  was applied after removal of HC-056456.

## Discussion

Major considerations in the design of a male-directed, non-hormonal contraceptive include efficacy, safety, reversibility, and ease of delivery [24]. The CatSper channel of sperm has several properties (for review see Navarro et al [25]) that make it an attractive target for contraceptive development. First, the required role of CatSper channel proteins in male fertility indicates that a CatSper channel blocker should effectively prevent fertilization. Second, CatSper channel proteins are found only in sperm and spermatogenic cells, indicating that a CatSper-specific blocking drug would have no channel-related actions elsewhere in the body. Third, the CatSper proteins apparently function only in mature sperm, indicating that a CatSper-blocking drug could be delivered only during periods of sexual activity to acutely prevent sperm from reaching and entering the egg. Such actions should be entirely reversible when delivery of drug ceases. By limiting treatment to periods of sexual activity, any cumulative off-target actions would be minimized. Fourth, the CatSper channel proteins in the surface membranes of sperm remain accessible after ejaculated sperm have left the protected environments of the testis and epididymis, indicating that oral delivery of small water-soluble drug could reach CatSper channels through transfer from serum to reproductive fluids. Oral delivery shortly before sexual activity should be a highly-acceptable treatment, with high compliance.

In drug discovery, initial screening of proprietary libraries of 'building block' compounds reveals active agents ('hits'). With luck, secondary screening of libraries of compounds related to these hits reveals something of the required molecular characteristics and identifies a more-limited library to be screened for potency. The most potent of these then become 'lead compounds' for pharmaceutical development by chemical modification. Large-scale screening efforts require functional expression of the target channel in a cultured cell line [26].

Compound HC-056456 was identified as a *hit* in an initial small-scale screen, and has now been confirmed as a CatSper channel blocker using a new optical method for monitoring of relative CatSper channel activity. This optical approach has the potential for development of a high-throughput method for screening of agents active against the native CatSper channel of intact sperm. Importantly, this method would bypass the barrier imposed by a continued inability to express functional CatSper channels in cultured cells.

Although we learned much about which cellular processes require CatSper from study of the CatSper-null sperm, other approaches were needed to address the temporal aspects of the roles of the CatSper channel. In past work [11] we rescued waveform asymmetry for CatSper-null sperm by application of the local anesthetic procaine. This finding indicates that CatSper has no required role in the prior developmental events that determine the assembly of an asymmetry-competent flagellum during spermiogenesis, or in downstream signaling events that couple  $\text{Ca}^{2+}$  entry to production of waveform asymmetry in mature sperm.

We have now applied a pharmacological-phenocopy approach to further define the temporal aspects of the required roles of CatSper channel activity. Specifically, we show that acute blockade of CatSper channels with compound HC-056456 prevents the onset of hyperactivation during capacitating incubations, and that application of HC-056456 to already-hyperactivated sperm causes a rapid reversible removal of waveform asymmetry. We can now say with reasonable certainty that open CatSper channels and entry of  $\text{Ca}^{2+}$  through them are required both to initiate and to maintain hyperactivation.

Unexpectedly, we found that the HC-056456 decreases the beat frequency of hyperactivated sperm, but not of sperm examined prior to capacitating incubations. This suggests either that capacitating incubations make sperm more vulnerable to a hypothetical deleterious action of HC-056456, or that CatSper has additional roles in controlling the flagellar beat, specifically the beat frequency of hyperactivated sperm. We note that some

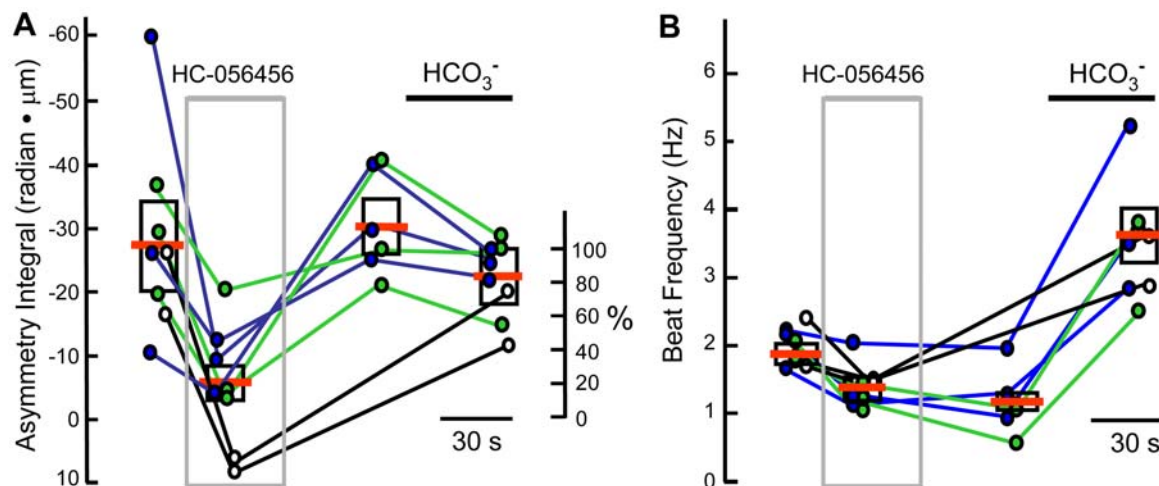

**Figure 6. Removal of waveform asymmetry is reversible.** After incubation under capacitating conditions, sperm were transferred to fresh medium HS. (A) Waveform asymmetry of individual sperm were examined while sequentially perfusing with HS alone, then at 30 s during a 60 s-perfusion with HS containing 20  $\mu\text{M}$  HC-056456 (gray box), then following 60 s of 'washout' with HS alone, and finally following 60 s of additional perfusion with HS containing 15 mM  $\text{NaHCO}_3$ . Data for the second and third trials are offset slightly to the right. Boxed bars indicate the mean and SEM of the time-averaged waveform asymmetry integrated over the proximal 50  $\mu\text{m}$  of the flagellum. The right axis normalizes the data to the overall average of the asymmetry integral for the cells during the initial perfusion with HS alone. (B) Flagellar beat frequency from the same image series of the same cells examined in A (8 cells in 3 independent experiments). doi:10.1371/journal.pone.0006844.g006

recent work found that sperm from CatSper-null mice had decreased longevity in vitro [9,10] and perhaps also in the female reproductive tract [27]. Those findings support the suggestion that additional roles for CatSper channels may be found in future work.

In addition to the pharmacological-phenocopy approach used here for study of the roles of CatSper in activation and hyperactivation of motility, we recently applied a chemical-genetic approach to extend our knowledge of the roles of PKA in the these processes. Using mice whose sperm express a mutant PKA catalytic subunit that is sensitive to the unique cell-permeant inhibitor 1NM-PP1, we found that acute application of the 1NM-PP1 to hyperactivated sperm did not remove waveform asymmetry. Thus, PKA activity apparently is not required to maintain hyperactivation. However, 1NM-PP1 reversibly blocked evoked acceleration of the flagellar beat evoked by  $\text{HCO}_3^-$ , and its application to already-activated mutant sperm produced a rapid return to the slow resting flagellar beat rate [28]. Thus, pharmacological targeting of 2 key components in  $\text{Ca}^{2+}$ -mediated and in cAMP-mediated signaling has advanced our understanding of the temporal requirements of the CatSper channel in maintaining the waveform asymmetry of hyperactivated motility and of PKA in maintaining the accelerated flagellar beat of activated motility.

Further improvements in the available pharmacological tools likely will provide additional insights into the properties, modulation, and roles of the CatSper channel of sperm. Optimization of a high throughput optical assay for native CatSper channel may be a first step in that direction.

## Supporting Information

**Figure S1** Chemical structure of compound HC-056456.

Found at: doi:10.1371/journal.pone.0006844.s001 (0.03 MB PDF)

## References

- Garbers DL, Kopf GS (1980) The regulation of spermatozoa by calcium cyclic nucleotides. *Adv Cyclic Nucleotide Res* 13: 251–306.
- Nolan MA, Babcock DF, Wennemuth G, Brown W, Burton KA, et al. (2004) Sperm-specific protein kinase A catalytic subunit  $\text{C}\alpha 2$  orchestrates cAMP signaling for male fertility. *Proc Natl Acad Sci U S A* 101: 13483–13488.
- Esposito G, Jaiswal BS, Xie F, Krajnc-Franken MA, Robben TJ, et al. (2004) Mice deficient for soluble adenylyl cyclase are infertile because of a severe sperm-motility defect. *Proc Natl Acad Sci U S A* 101: 2993–2998.
- Hess KC, Jones BH, Marquez B, Chen Y, Ord TS, et al. (2005) The “soluble” adenylyl cyclase in sperm mediates multiple signaling events required for fertilization. *Dev Cell* 9: 249–259.
- Xie F, Garcia MA, Carlson AE, Schuh SM, Babcock DF, et al. (2006) Soluble adenylyl cyclase (sAC) is indispensable for sperm function and fertilization. *Dev Biol* 296: 353–362.
- Schuh SM, Carlson AE, McKnight GS, Conti M, Hille B, et al. (2006) Signaling pathways for modulation of mouse sperm motility by adenosine and catecholamine agonists. *Biol Reprod* 74: 492–500.
- Ren D, Navarro B, Perez G, Jackson AC, Hsu S, et al. (2001) A sperm ion channel required for sperm motility and male fertility. *Nature* 413: 603–609.
- Quill TA, Sugden SA, Rossi KL, Doolittle LK, Hammer RE, et al. (2003) Hyperactivated sperm motility driven by CatSper2 is required for fertilization. *Proc Natl Acad Sci U S A* 100: 14869–14874.
- Jin J, Jin N, Zheng H, Ro S, Tafolla D, et al. (2007) Catsper3 and Catsper4 are essential for sperm hyperactivated motility and male fertility in the mouse. *Biol Reprod* 77: 37–44.
- Qi H, Moran MM, Navarro B, Chong JA, Krapivinsky G, et al. (2007) All four CatSper ion channel proteins are required for male fertility and sperm cell hyperactivated motility. *Proc Natl Acad Sci U S A* 104: 1219–1223.
- Carlson AE, Quill TA, Westenbroek RE, Schuh SM, Hille B, et al. (2005) Identical phenotypes of CatSper1 and CatSper2 null sperm. *J Biol Chem* 280: 32238–32244.
- Liu J, Xia J, Cho KH, Clapham DE, Ren D (2007) CatSper $\beta$ , a novel transmembrane protein in the CatSper channel complex. *J Biol Chem* 282: 18945–18952.
- Marquez B, Suarez SS (2007) Bovine sperm hyperactivation is promoted by alkaline-stimulated  $\text{Ca}^{2+}$  influx. *Biol Reprod* 76: 660–665.
- Carlson AE, Westenbroek RE, Quill T, Ren D, Clapham DE, et al. (2003) CatSper1 required for evoked  $\text{Ca}^{2+}$  entry and control of flagellar function in sperm. *Proc Natl Acad Sci U S A* 100: 14864–14868.
- Kirichok Y, Navarro B, Clapham DE (2006) Whole-cell patch-clamp measurements of spermatozoa reveal an alkaline-activated  $\text{Ca}^{2+}$  channel. *Nature* 439: 737–740.
- Carlson AE, Hille B, Babcock DF (2007) External  $\text{Ca}^{2+}$  acts upstream of adenylyl cyclase SACY in the bicarbonate signaled activation of sperm motility. *Dev Biol* 312: 183–192.
- Wennemuth G, Carlson AE, Harper AJ, Babcock DF (2003) Bicarbonate actions on flagellar and  $\text{Ca}^{2+}$ -channel responses: Initial events in sperm activation. *Development* 130: 1317–1326.
- Wennemuth G, Babcock DF, Hille B (2003) Calcium clearance mechanisms of mouse sperm. *J Gen Physiol* 122: 115–128.
- Navarro B, Kirichok Y, Clapham DE (2007) KSper, a pH-sensitive  $\text{K}^+$  current that controls sperm membrane potential. *Proc Natl Acad Sci U S A* 104: 7688–7692.
- Meier SD, Kovalchuk Y, Rose CR (2006) Properties of the new fluorescent  $\text{Na}^+$  indicator CoroNa Green: comparison with SBFI and confocal  $\text{Na}^+$  imaging. *J Neurosci Methods* 155: 251–259.
- Babcock DF (1983) Examination of the intracellular ionic environment and of ionophore action by null point measurements employing the fluorescein chromophore. *J Biol Chem* 258: 6380–6389.
- Yanagimachi R (1982) Requirement of extracellular calcium ions for various stages of fertilization and fertilization-related phenomena in the hamster. *Gamete Res* 5: 323–344.
- Cooper TG (1984) The onset and maintenance of hyperactivated motility of spermatozoa from the mouse. *Gamete Res* 9: 55–74.
- Nass SJ, Strauss JF 3rd (2004) Strategies to facilitate the development of new contraceptives. *Nat Rev Drug Discov* 3: 885–890.
- Navarro B, Kirichok Y, Chung JJ, Clapham DE (2008) Ion channels that control fertility in mammalian spermatozoa. *Int J Dev Biol* 52: 607–613.

**Figure S2** HC-056456 selectively blocks CatSper currents in mouse sperm. (A) Current-voltage relationships showing CatSper currents recorded from mouse sperm in response to voltage ramps from  $-100$  to  $+100$  mV. Using the whole-sperm patch-clamp technique CatSper currents were recorded in divalent free buffer (inset) or buffer containing  $\sim 700$  nM free  $\text{Ca}^{2+}$  (trace 1). CatSper currents were blocked  $\sim 55\%$  by the addition of  $20 \mu\text{M}$  HC-056456 (trace 2). Addition of buffer containing  $2 \text{mM}$  free  $\text{Ca}^{2+}$  almost completely blocked the CatSper current (trace 3). Scale bar shows 50 ms on the x axis and 100 pA on the y axis. Inset scale bar is 50 ms on the x axis and 250 pA on the y axis. (B) History plot showing rapid and reversible block of CatSper currents by  $20 \mu\text{M}$  HC-056456 in buffer containing  $\sim 700$  nM free  $\text{Ca}^{2+}$ . The HC-056456 decreased currents by  $>50\%$ , then rapidly returned to the preblock amplitude during washout. Currents were monitored at  $+80$  and  $-80$  mV every 5 s and corrected for the leak currents recorded in medium containing  $2 \text{mM}$   $\text{Ca}^{2+}$ . (C) KSper currents recorded from mouse sperm in response to voltage ramps from  $-100$  to  $+100$  mV. The inward currents observed are a mixture of KSper and CatSper, while the outward currents are composed almost exclusively of KSper (trace 1). Addition of  $50 \mu\text{M}$  HC-056456 blocked slightly more than 50% of the current (trace 2). Addition of  $500 \mu\text{M}$  quinidine almost completely blocked the KSper currents (trace 3). Scale bar is 50 ms on the x axis and 50 pA on the y axis.

Found at: doi:10.1371/journal.pone.0006844.s002 (0.02 MB PDF)

## Author Contributions

Conceived and designed the experiments: AEC DdC DFB. Performed the experiments: AEC LAB DdC JAC MMM DFB. Analyzed the data: AEC DdC JAC DFB. Contributed reagents/materials/analysis tools: AEC TAQ JAC MMM DFB. Wrote the paper: AEC DFB. Contributed to finalizing the paper for submission: AEC LAB DdC TAQ BH JAC MMM.



26. Dunlop J, Bowlby M, Peri R, Vasilyev D, Arias R (2008) High-throughput electrophysiology: an emerging paradigm for ion-channel screening and physiology. *Nat Rev Drug Discov* 7: 358–368.
27. Ho K, Wolff CA, Suarez SS (2009) CatSper-null mutant spermatozoa are unable to ascend beyond the oviductal reservoir. *Reprod Fertil Dev* 21: 345–350.
28. Morgan DJ, Weisenhaus M, Shum S, Su T, Zheng R, et al. (2008) Tissue-specific PKA inhibition using a chemical genetic approach and its application to studies on sperm capacitation. *Proc Natl Acad Sci U S A* 105: 20740–20745.
